# Supplementary material for: Cellular Heterogeneity During Embryonic Stem Cell Differentiation to Epiblast Stem Cells is Revealed by the ShcD/RaLP Adaptor Protein
Source: PubMed Central journal article supplement (PMC3533801; doi:10.1002/stem.1217), 2012-09-04

**A**

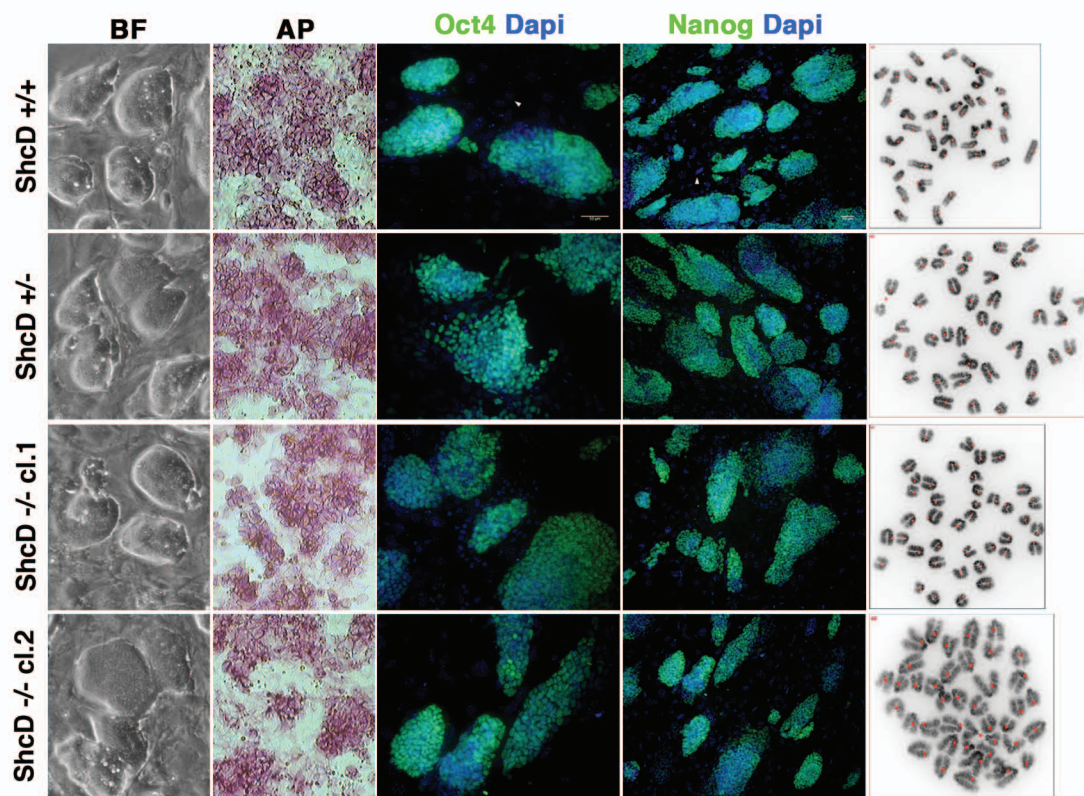

**B**

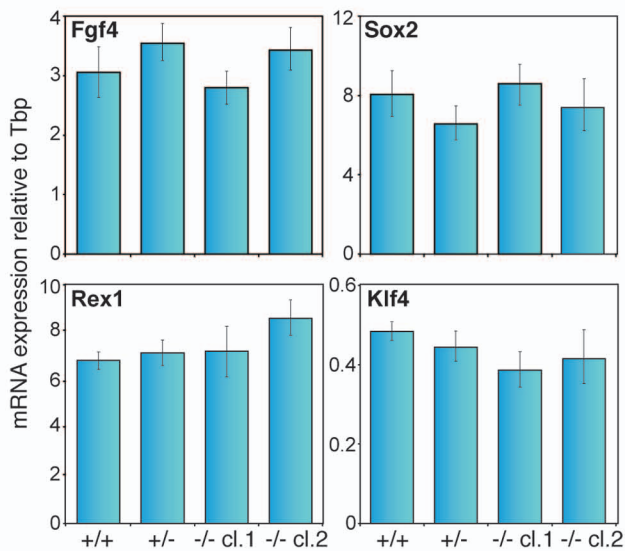

**D**

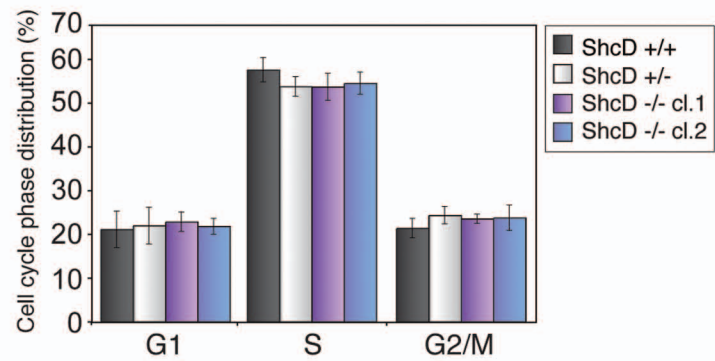

**C**

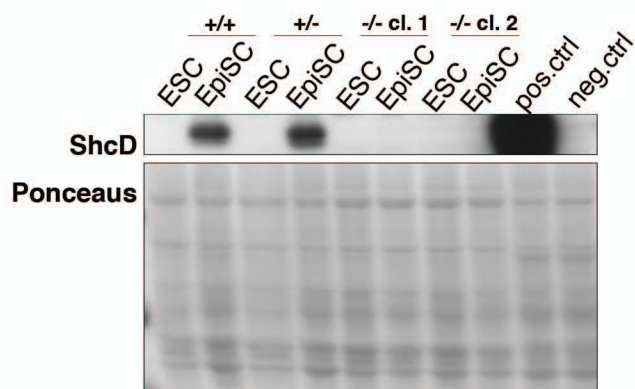

**E**

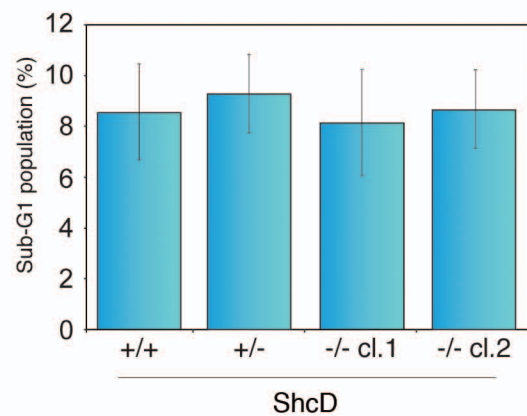

Supplement: stem0030-2423-SD2.pdf [file stem0030-2423-SD2.pdf]
